# Supplementary material for: Assessing Fe and Zn content in Egeria densa: Sample treatment influences significantly the quantification of metals in Egeria densa
Source: Research Square preprint supplement (doi:10.21203/rs.3.rs-6977985/v1), 2025-07-21
Supplement: Supplementary file 1 [file f9f9492508c10190612e50e2.docx]

**Supplementary information**

**TABLE S1**. Sample information for the different sampling campaigns performed during this study. ES: Exploratory Sampling; SS: Study Site; CS: Control Site.

| Sampling campaign | Date of Collection | Field  ID | Laboratory ID | Coordinates East | Coordinates  South |
| --- | --- | --- | --- | --- | --- |
| 1 | 10/05/2022 | FL000 | ES1 | 648970 | 5597694 |
| 2 | 17/05/2022 | FL001 | ES2 | 648967 | 5597720 |
|  | 17/05/2022 | FL002 | ES3 | 657214 | 5603441 |
|  | 17/05/2022 | FL003 | ES4 | 655247 | 5601580 |
| 3 | 01/07/2022 | FL004 | ES5 | 653432 | 5600472 |
|  | 01/07/2022 | FL005 | ES6 | 654217 | 5603500 |
|  | 01/07/2022 | FL006 | ES7 | 653746 | 5604055 |
| 4 | 26/09/2022 | FL004.2 | SS04.22 | 654190 | 5603511 |
|  | 26/09/2022 | FL007 | SS07.22 | 649059 | 5598191 |
|  | 26/09/2022 | FL008 | SS08.22 | 650199 | 5601276 |
|  | 26/09/2022 | FL009 | SS09.22 | 655435 | 5601307 |
| 5 | 06/04/2023 | FL010 | CS10.23 | 650951 | 5591957 |
|  | 06/04/2023 | FL011 | CS11.23 | 652987 | 5591839 |
|  | 06/04/2023 | FL012 | CS12.23 | 657781 | 5592311 |
|  | 06/04/2023 | FL013 | CS13.23 | 657766 | 5592115 |
|  | 06/04/2023 | FL014 | CS14.23 | 656507 | 5593434 |
| 6 | 18/08/2023 | FL015 | SS15.23 | 658855 | 5614506 |
|  | 18/08/2023 | FL016 | SS16.23 | 655822 | 5610275 |
|  | 18/08/2023 | FL017 | SS17.23 | 656220 | 5607664 |
|  | 18/08/2023 | FL018 | SS04.23 | 654183 | 5603511 |
|  | 18/08/2023 | FL019 | SS08.23 | 650196 | 5601256 |
| 7 | 24/08/2023 | FL020 | SS20.23 | 648951 | 5597734 |
|  | 24/08/2023 | FL021 | SS07.23 | 649033 | 5598243 |
|  | 24/08/2023 | FL022 | SS22.23 | 650600 | 5601481 |
|  | 24/08/2023 | FL023 | SS09.23 | 655428 | 5601318 |
|  | 24/08/2023 | FL024 | SS24.23 | 657090 | 5603474 |
| 8 | 05/04/2024 | FL025 | SS15.24 | 658881 | 5614516 |
|  | 05/04/2024 | FL026 | SS16.24 | 655806 | 5610260 |
|  | 05/04/2024 | FL027 | SS17.24 | 656219 | 5607675 |
|  | 05/04/2024 | FL028 | SS04.24 | 654189 | 5603501 |
|  | 05/04/2024 | FL029 | SS24.24 | 657093 | 5603464 |
|  | 05/04/2024 | FL030 | SS09.24 | 655415 | 5601342 |
|  | 05/04/2024 | FL031 | SS31.24 | 655127 | 5601690 |
|  | 23/04/2024 | FL032 | CS10.24 | 650951 | 5591956 |
|  | 23/04/2024  23/04/2024 | FL033  FL034 | CS33.24  CS34.24 | 653132  654482 | 5592838  5594331 |

**TABLE S2**. Quality control parameters for Fe and Zn obtained from repeated analysis of EnviroMAT SS-2. All values are in mg kg-1 unless stated otherwise.

| **Element** | **Consensus**  **Value** | **Uncertainty** | **Confidence interval** | **Tolerance**  **interval** | **Obtained** | **%SD** | **Recovery**  **(%)** | **Agreement** |
| --- | --- | --- | --- | --- | --- | --- | --- | --- |
| Fe | 23,083 | 597 | 22.486-23.680 | 17,888-28,278 | 22,087 | 2.0 | 95.7 | Tolerance |
| Zn | 281 | 7 | 274-288 | 220-342 | 243 | 5.5 | 86.5 | Tolerance |

**TABLE S3**. Concentrations of Fe and Zn in *E. densa* (mg kg-1) from two different commercial laboratories. G: green, B: Black sections.

|  | Fe | | | | Zn | | | |
| --- | --- | --- | --- | --- | --- | --- | --- | --- |
| Sample Code | Laboratory 1 | Laboratory 2 | Absolute  difference | Difference (%) | Laboratory 1 | Laboratory 2 | Absolute  difference | Difference (%) |
| E21B | 1,479 | 612 | 867 | 242 | 50.8 | 9.0 | 41.8 | 564 |
| E21G | 1,838 | 476 | 1,362 | 386 | 39.9 | 2.3 | 37.6 | 1,735 |
| E22B | 1,390 | 411 | 979 | 338 | 42.2 | 2.3 | 39.9 | 1,835 |
| E22G | 1,726 | 1,291 | 435 | 134 | 35.8 | 3.8 | 32 | 942 |
| E23B | 801 | 189 | 612 | 425 | 48.5 | 3.4 | 45.1 | 1,426 |
| E23G | 2,822 | 322 | 2,500 | 877 | 42.2 | 2 | 40.2 | 2,110 |
| E24B | 1,429 | 252 | 1,177 | 568 | 51.9 | 2.5 | 49.4 | 2,076 |
| E24G | 2,711 | 388 | 2,324 | 700 | 45.6 | 1.7 | 43.9 | 2,682 |
| E25B | 1,597 | 708 | 889 | 226 | 76.2 | 3.6 | 72.6 | 2,117 |
| E25G | 2,930 | 381 | 2,549 | 769 | 65.4 | 2.6 | 62.8 | 2,515 |
| E26B | 997 | 494 | 503 | 202 | 78.2 | 2.9 | 75.3 | 2,697 |
| E26G | 3,206 | 658 | 2,548 | 487 | 88.8 | 4.5 | 84.3 | 1,973 |
| E27B | 4,214 | 1,194 | 3,020 | 353 | 52.1 | 5.4 | 46.7 | 965 |
| E27G | 26,737 | 1,755 | 24,982 | 1,524 | 48.2 | 5.3 | 42.9 | 909 |
| E32B | 3,441 | 950 | 2,491 | 362 | 33.2 | 4.8 | 28.4 | 692 |
| E32G | 5,743 | 1,640 | 4,103 | 350 | 26.6 | 4.9 | 21.7 | 543 |
| E33B | 4,463 | 839 | 3,624 | 532 | 35.2 | 4.6 | 30.6 | 765 |
| E33G | 17,908 | 1,111 | 16,797 | 1,612 | 30.8 | 5.7 | 25.1 | 540 |
| E34B | 2,413 | 333 | 2,081 | 726 | 36.6 | 3.7 | 32.9 | 989 |
| E34G | 15,002 | 470 | 14,532 | 3,189 | 29.3 | 2.6 | 26.7 | 1,127 |
| E35B | 3,484 | 617 | 2,867 | 565 | 41.9 | 3.3 | 38.6 | 1,270 |
| E35G | 11,272 | 2,026 | 9,246 | 556 | 33.6 | 4.0 | 29.6 | 840 |
| E36B | 5,827 | 1,018 | 4,809 | 572 | 30.6 | 2.7 | 27.9 | 1,133 |
| E36G | 12,750 | 2,162 | 10,588 | 590 | 20.6 | 1.9 | 18.7 | 1,084 |
| E37B | 2,487 | 498 | 1,989 | 499 | 28.8 | 2.5 | 26.3 | 1,152 |
| E37G | 7,276 | 422 | 6,854 | 1,724 | 23.0 | 2.2 | 20.8 | 1,045 |

**TABLE S4**. Field washing experiment results for Fe and Zn (mg kg-1)

| **Sample code** | **River Wash** | **Fe** | **Zn** |
| --- | --- | --- | --- |
| **ES2.1** | **No** | 21,455 | 101.3 |
| **ES2.2** | 21,688 | 102.1 |
| **ES2.3** | 21,455 | 101.6 |
| **ES2.4** | 24,567 | 102.4 |
| **ES2.5** | 24,798 | 104.8 |
| **ES3.1** | 56,200 | 71.3 |
| **ES3.2** | 56,642 | 71.6 |
| **ES3.3** | 58,737 | 77.4 |
| **ES3.4** | 59,188 | 77.5 |
| **ES3.5** | 55,419 | 78.2 |
| **ES4.1** | 46,686 | 67.2 |
| **ES4.2** | 46,906 | 66.4 |
| **ES4.3** | 46,466 | 63.1 |
| **ES4.4** | 44,067 | 64.5 |
| **ES4.5** | 44,283 | 71.6 |
| **ES4.6** | 44,070 | 70.9 |
| **ES4.7** | 44,886 | 66.8 |
| **ES4.8** | 45,111 | 66.4 |
| **ES4.9** | 44,890 | 63.8 |
| **ES5.1** | **Yes** | 27,078 | 63.1 |
| **ES5.2** | 27,717 | 61.1 |
| **ES5.3** | 28,939 | 61.9 |
| **ES5.4** | 29,577 | 61.5 |
| **ES5.5** | 34,041 | 60.7 |
| **ES5.6** | 26,726 | 60.9 |
| **ES6.1** | 11,817 | 59.8 |
| **ES6.2** | 12,460 | 58.7 |
| **ES6.3** | 12,892 | 65.3 |
| **ES7.1** | 20,683 | 52.2 |
| **ES7.2** | 20,063 | 50.4 |
| **ES7.3** | 17,925 | 47.8 |
| **ES7.4** | 18,712 | 46.9 |

**TABLE S5**. Laboratory washing using small jets of distilled water in both sites (study and control). G: green portion, B: Black portion. CS: Control site, SS: Sampling site.

|  | | Laboratory Washing | | | |
| --- | --- | --- | --- | --- | --- |
|  | | Yes | No | Yes | No |
|  | Sample ID | Fe (mg/kg) | | Zn (mg/kg) | |
| Control Site | CS11.23_G | 2,378 ± 80 | 3,812 ± 53 | 65 ± 1 | 121 ± 6 |
| CS11.23_B | 2,912 ± 153 | 13,750 ± 169 | 49.2 ± 0.8 | 65 ± 1 |
| CS12.23_G | 2,997 ± 156 | 5,137 ± 52 | 47 ± 3 | 89.5 ± 0.6 |
| CS12.23_B | 3,611 ± 136 | 5,683 ± 279 | 42.4 ± 0.8 | 46 ± 4 |
| CS13.23_G | 2,110 ± 626 | 3,884 ± 246 | 59 ± 2 | 89 ± 2 |
| CS13.23_B | 2,971 ± 269 | 4,149 ± 39 | 50.1 ± 0.8 | 61 ± 1 |
| CS14.23_G | 2,184 ± 850 | 4,908 ± 635 | 56 ± 1 | 111 ± 1 |
| CS14.23_B | 3,552 ± 230 | 3,545 ± 127 | 58 ± 1 | 54.4 ± 0.6 |
| Study Site | SS22.23_G | 2,755 ± 53 | 2,780 ± 56 | 112 ± 1 | 106 ± 1 |
| SS22.23_B | 5,248 ± 351 | 5,643 ± 100 | 121 ± 4 | 86 ± 2 |
| SS09.23_G | 5,794 ± 397 | 5,578 ± 131 | 122 ± 5 | 125 ± 2 |
| SS09.23_B | 6,187 ± 176 | 6,253 ± 444 | 111 ± 3 | 102 ± 5 |

**TABLE S6**. Summary statistics for Comparison of Fe and Zn levels detected in different sections of the plants when washed “W” and not washed “NW”

| **Element** | **Sampling**  **Site** | **Fraction** | **Lab**  **Washed** | ***n*** | **Media** | **Standard**  **Deviation** | **Median** | **Min** | **Max** |
| --- | --- | --- | --- | --- | --- | --- | --- | --- | --- |
| Fe | Control  Site | G | Yes | 12 | 2,417 | 168 | 2,425 | 1,394 | 3,145 |
| G | No | 4,435 | 198 | 4,301 | 3,725 | 5,629 |
| B | Yes | 3,621 | 378 | 3,215 | 2,661 | 3,763 |
| B | No | 6,782 | 4,282 | 4,808 | 3,436 | 13,909 |
| Zn | G | Yes | 57 | 7 | 57 | 44 | 67 |
| G | No | 102 | 15 | 100 | 87 | 127 |
| B | Yes | 50 | 6 | 50 | 41 | 59 |
| B | No | 57 | 8 | 57 | 43 | 67 |
| Fe | Study  Site | G | Yes | 6 | 4,275 | 1,683 | 4,090 | 2,697 | 6,171 |
| G | No | 4,179 | 1,535 | 4,139 | 2,733 | 5,697 |
| B | Yes | 5,717 | 571 | 5,832 | 4,929 | 6,382 |
| B | No | 5,948 | 441 | 5,786 | 5,581 | 6,701 |
| Zn | G | Yes | 117 | 6 | 114 | 111 | 127 |
| G | No | 116 | 10 | 115 | 106 | 127 |
| B | Yes | 116 | 6 | 115 | 108 | 125 |
| B | No | 94 | 10 | 92 | 84 | 107 |
